# Supplementary material for: Use of Mechanical Turk as a MapReduce Framework for Macular OCT Segmentation
Source: Hindawi journal article supplement (doi:10.1155/2016/6571547), 2016-01-01

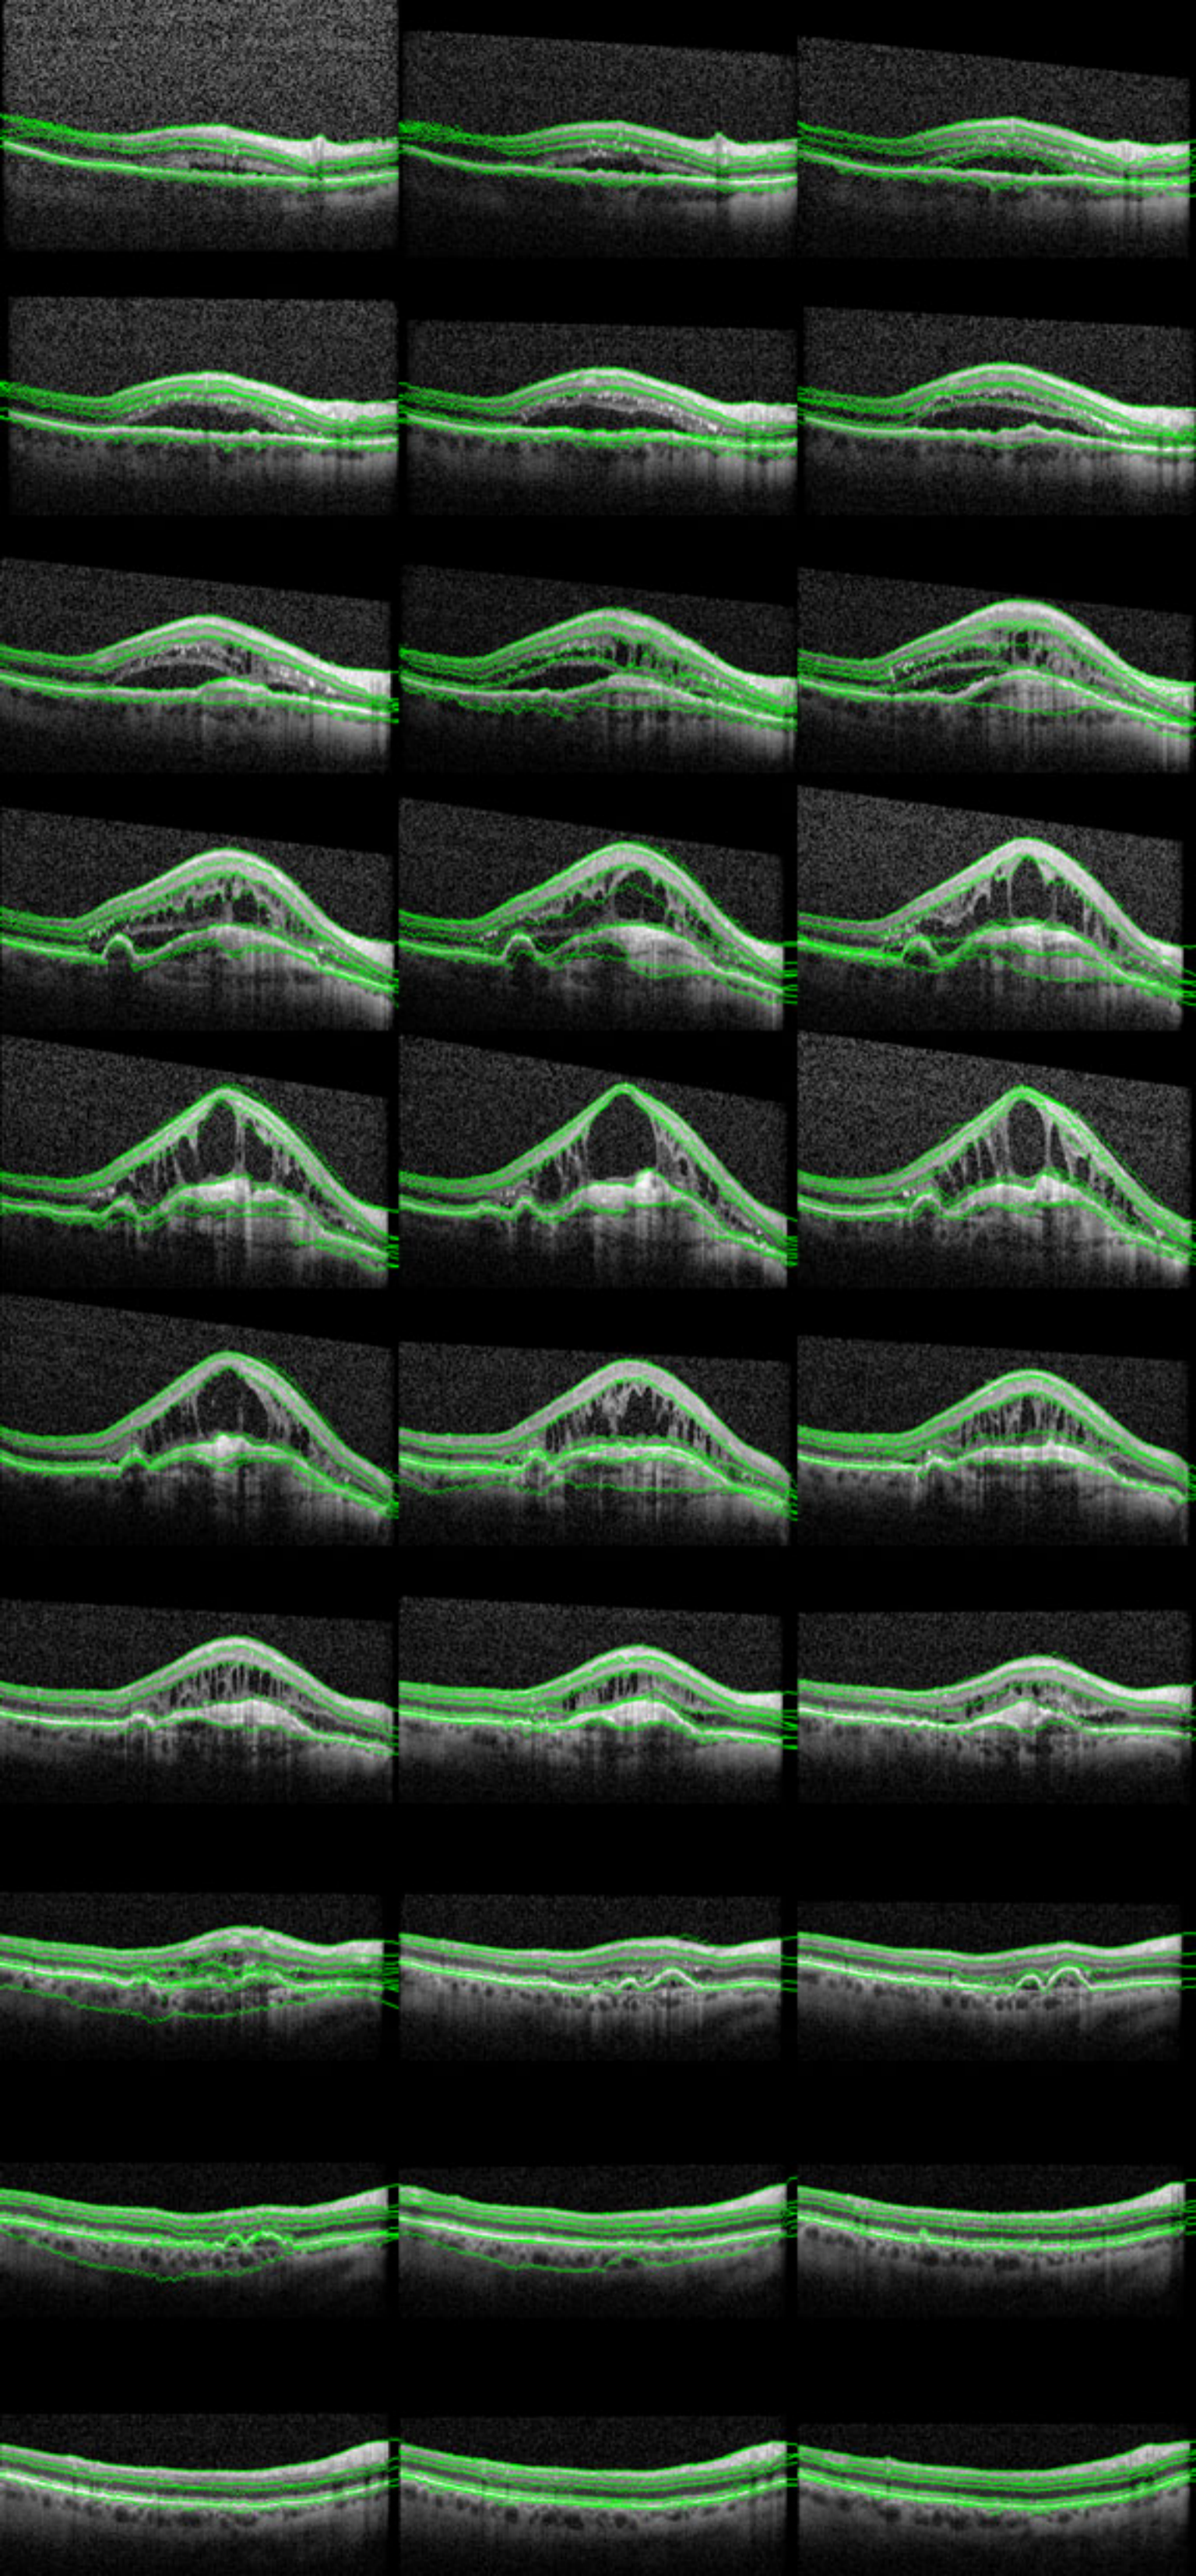

Supplement: f1 [file 6571547.f1.pdf]
